# Supplementary material for: Pinning and elongating of electric treeing induced by wrinkled nanosheets in polymer dielectrics towards significantly enhanced high-temperature energy storage performance
Source: Royal Society of Chemistry journal article supplement (doi:10.1039/d5ta00457h), 2025-01-01
Supplement: d5ta00457h1.pdf [file d5ta00457h1.pdf]

*Supporting Information for*

**Pinning and Elongating of Electric Treeing Induced by Wrinkled  
Nanosheets in Polymer Dielectrics towards Significantly Enhanced  
High-temperature Energy Storage Performance**

*Xuyuan Fan<sup>a</sup>, Linwei Zhu<sup>a</sup>, Zelong Chang<sup>a</sup>, Qingyang Tang<sup>a</sup>, Davoud Dastan<sup>b</sup>,  
Runhua Fan<sup>c</sup>, Zhicheng Shi<sup>a,\*</sup>*

<sup>a</sup> *School of Materials Science and Engineering, Ocean University of China, Qingdao  
266100, China*

<sup>b</sup> *Department of Materials Science and Engineering, Cornell University, Ithaca, NY  
14850, USA*

<sup>c</sup> *College of Ocean Science and Engineering, Shanghai Maritime University,  
Shanghai 201306, P. R. China.*

\*Corresponding author: Zhicheng Shi

*E-mail: zcshi@ouc.edu.cn (Z.Shi)*

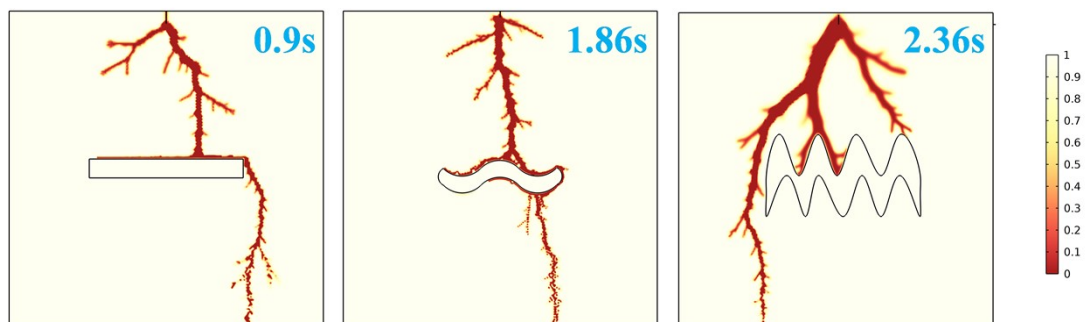

**Figure S1** Simulated breakdown paths of flat (left), low-curvature (middle), and high-curvature (right) nanosheets

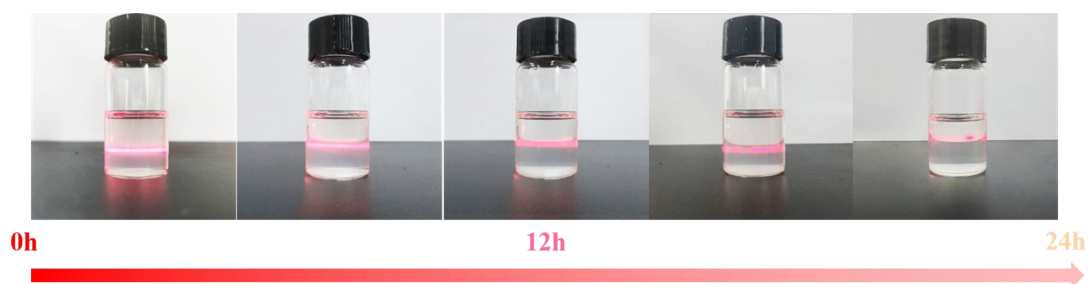

**Figure S2** The Tyndall Effect of WAO Solution (NMP as Solvent)

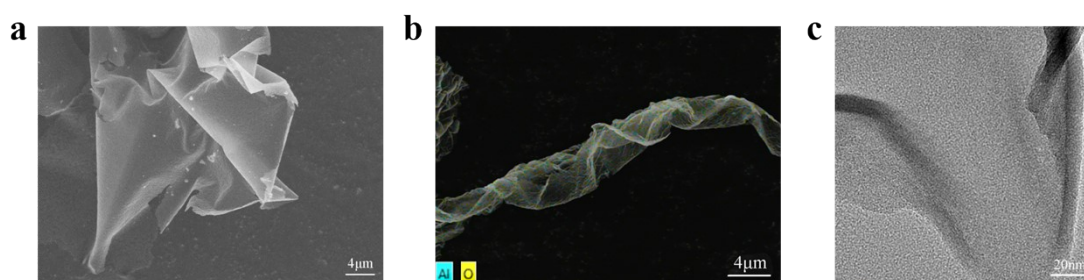

**Figure S3** (a) SEM; (b) EDX and (c) high magnification TEM image of wrinkled nanosheets

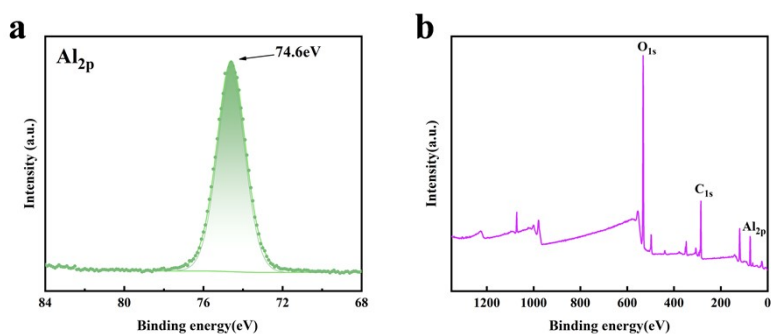

**Figure S4** XPS image of wrinkled  $\text{Al}_2\text{O}_3$  nanosheets

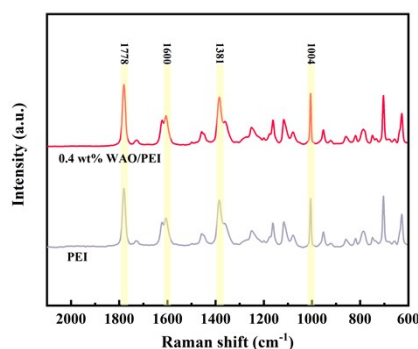

**Figure S5** Raman spectra of pure PEI and 0.4 wt% WAO/PEI films

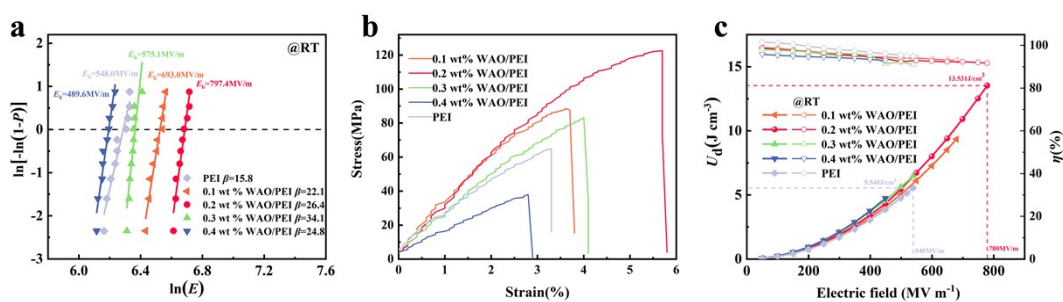

**Figure S6** (a) The breakdown strength; (b) Representative tensile strengths; (c) Energy storage density of pure PEI and 0.1- 0.4 wt% WAO/PEI films at room temperature

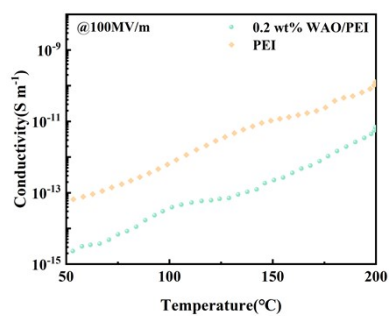

**Figure S7** The temperature-dependent conductivity of pure PEI and 0.2 wt% WAO/PEI composite films

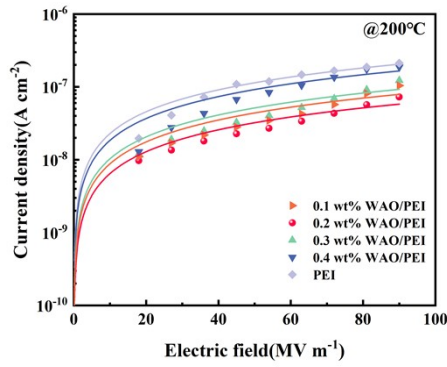

**Figure S8** Leakage current density of pure PEI and 0.1-0.4wt% composite films at 200°C

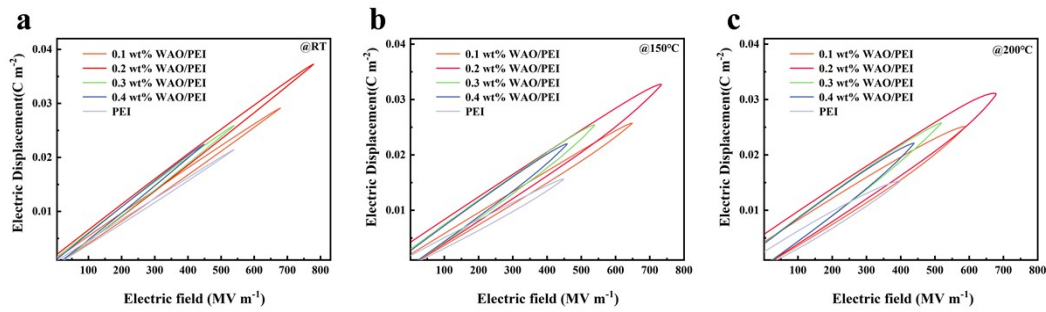

**Figure S9** *D-E* loops of WAO/PEI at (a) RT, (b) 150 °C, and (c) 200 °C

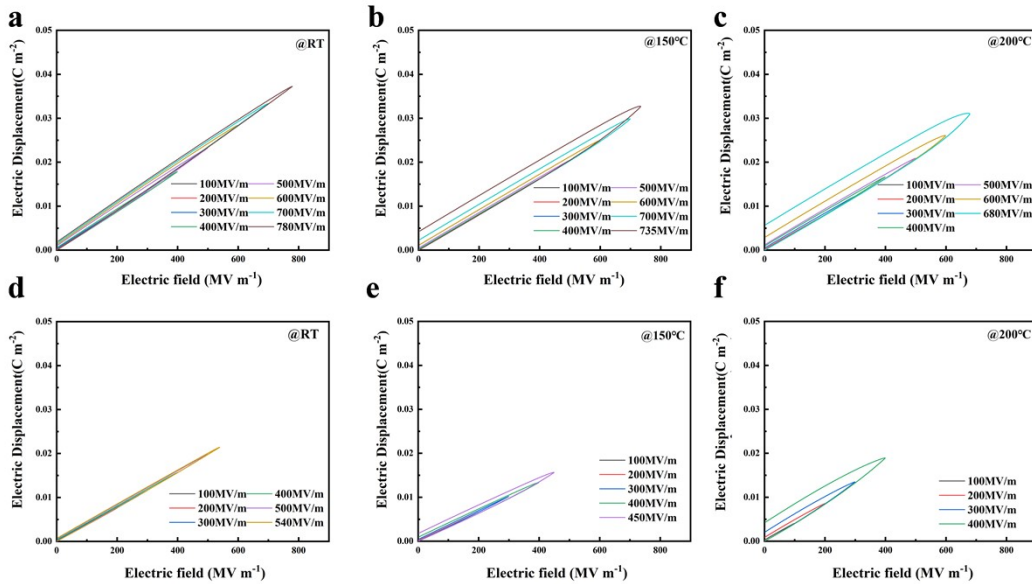

**Figure S10** *D-E* loops of pure PEI and 0.2 wt% WAO/PEI composite films under different electric fields at room temperature, 150 °C, and 200 °C

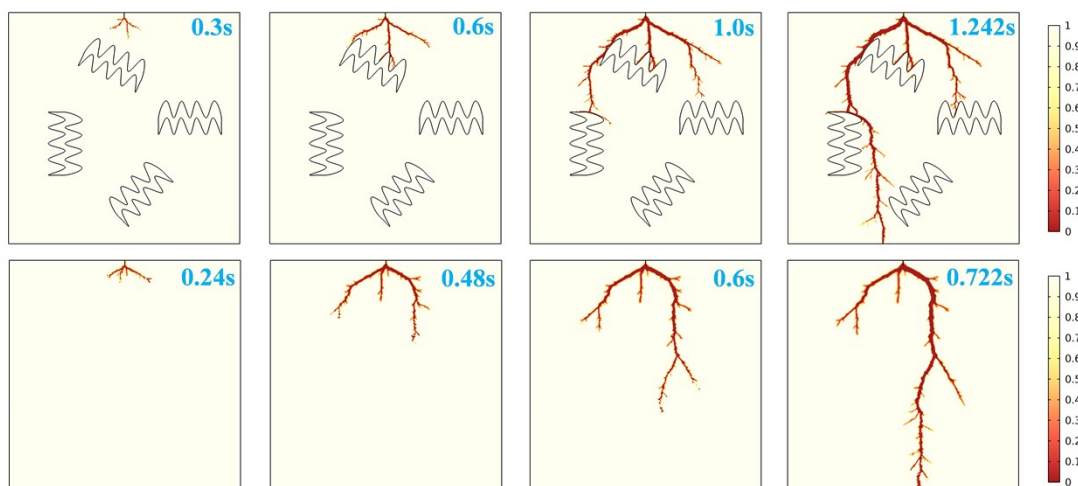

**Figure S11** Breakdown path simulation of WAO/PEI composites (top) and PEI (bottom) via COMSOL software

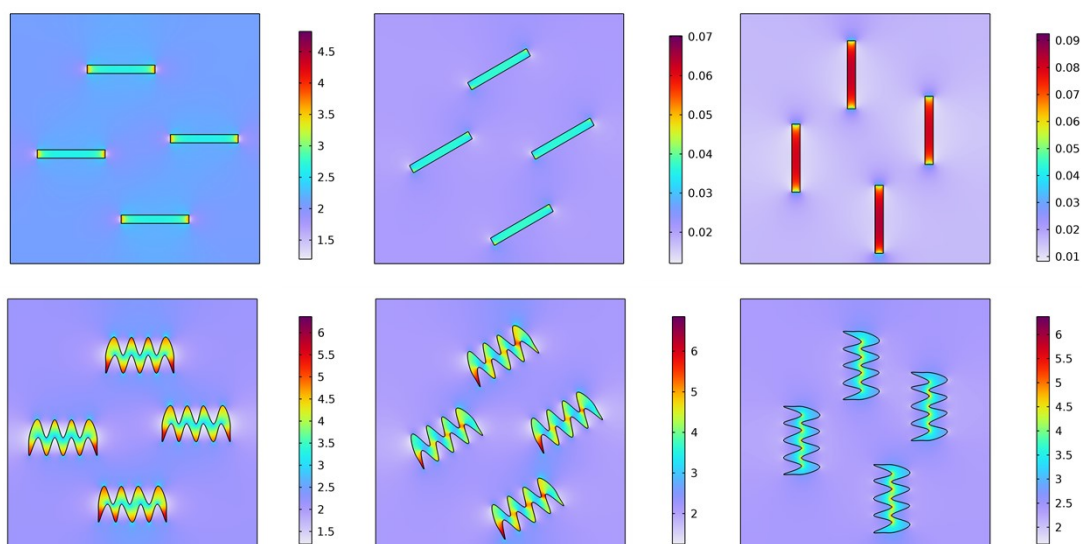

**Figure S12** Polarization of flat nanosheets (top) and wrinkled nanosheets (bottom) with different orientations

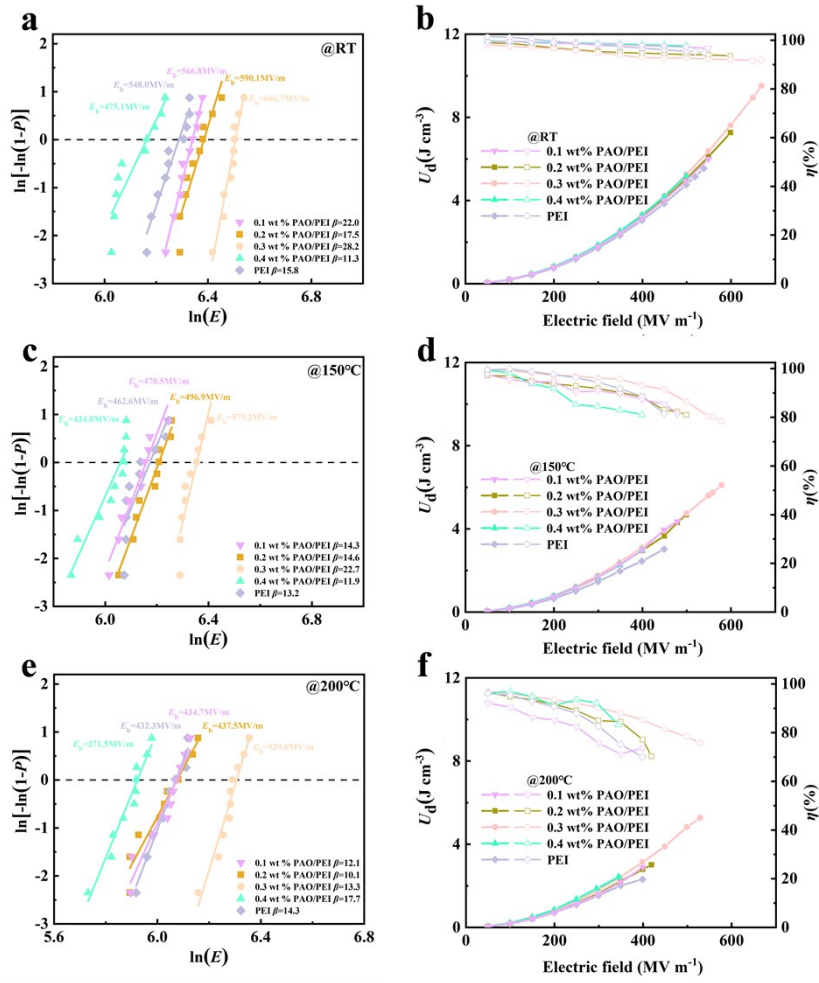

**Figure S13** Breakdown strength and energy storage density of PAO/PEI composites at room temperature, 150 °C, 200 °C

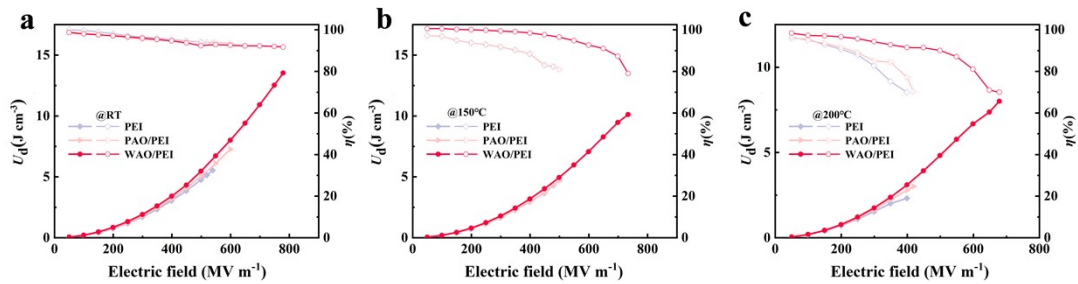

**Figure S14** Energy storage density of pure PEI, 0.2 wt% PAO/PEI and 0.2 wt% WAO/PEI composites at room temperature, 150 °C, 200 °C



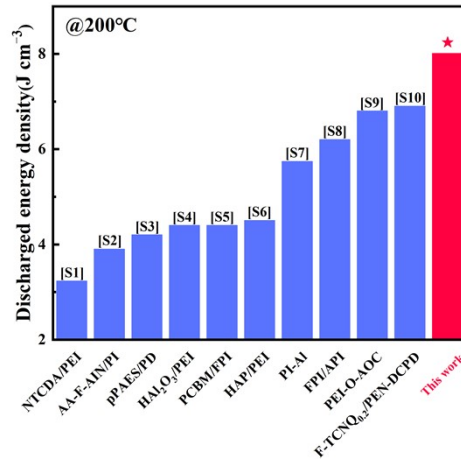

**Figure S15** The maximum discharge energy density at 200°C was compared to the previously published discharge energy density of a high temperature polymer composite film. [S1-S10]

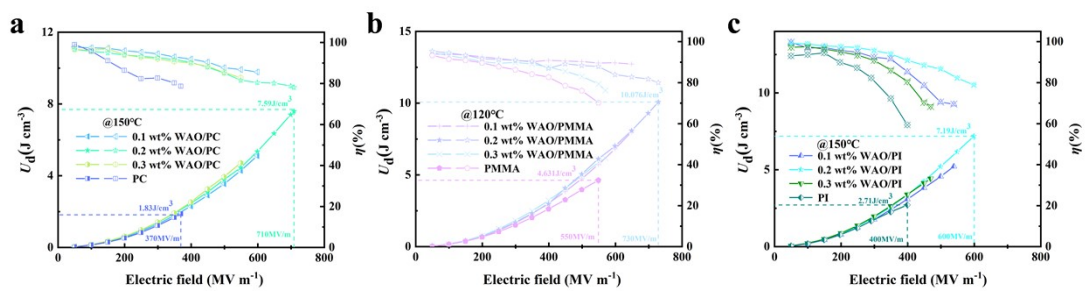

**Figure S16** Energy storage properties of wrinkled alumina incorporated into PC, PMMA, and PI at elevated temperatures

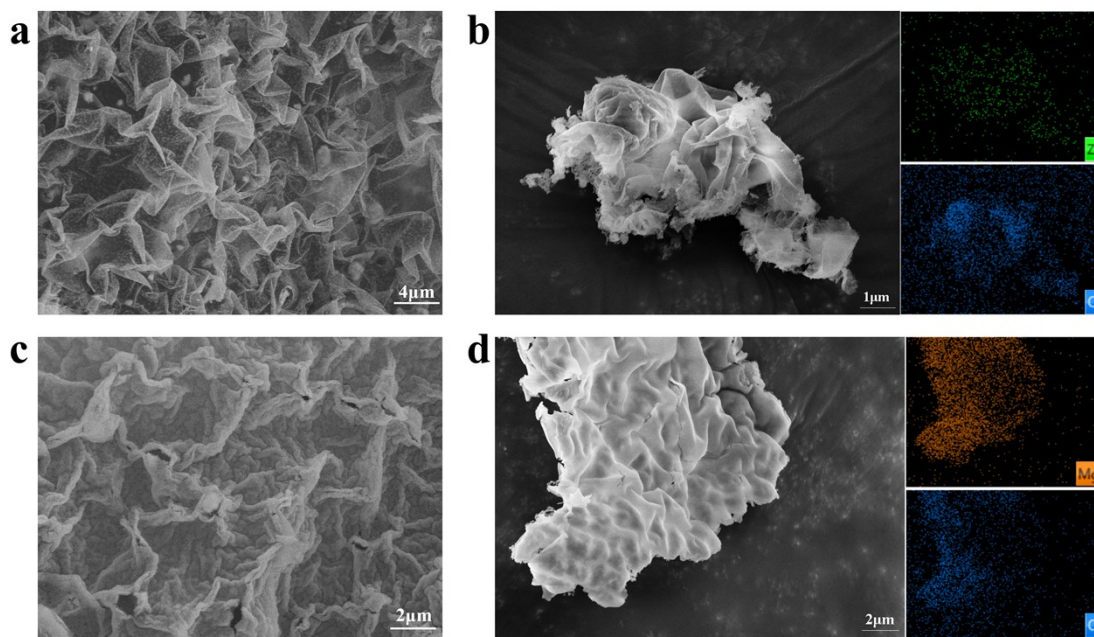

**Figure S17** SEM image of a) wrinkled MgO nanosheets b) wrinkled ZrO<sub>2</sub> nanosheets

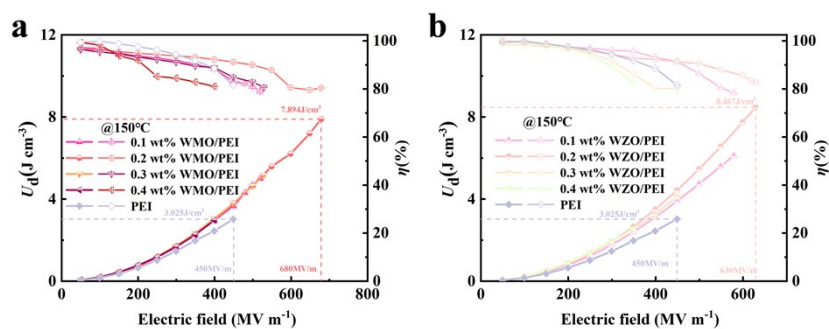

**Figure S18** Energy storage properties of wrinkled magnesium oxide and zirconium oxide produced by a similar method incorporating PEI at elevated temperatures

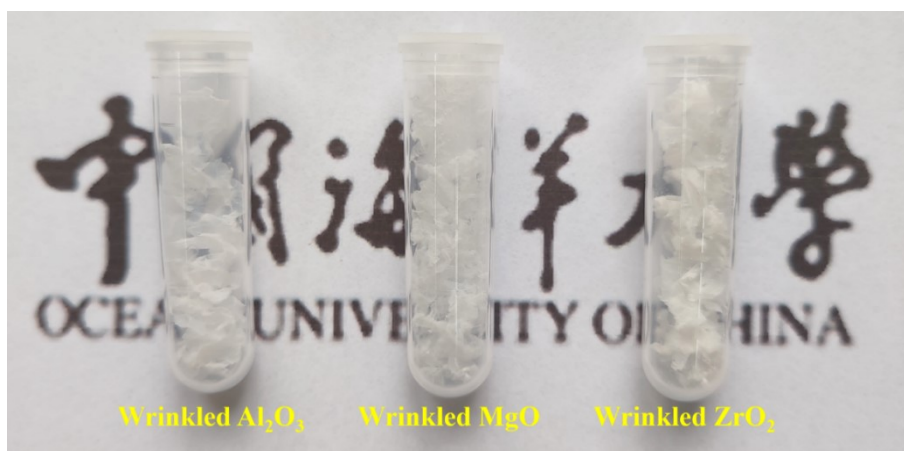

**Figure S19** Macroscopic morphology of wrinkled  $\text{Al}_2\text{O}_3$ ,  $\text{MgO}$  and  $\text{ZrO}_2$

**Table S1** EDX mapping elemental analyses showed the mass fractions of the elements Al and O

| Elements | Signal Type | Wt%   | Wt% Sigma | At%  |
|----------|-------------|-------|-----------|------|
| O        | EDS         | 50.43 | 0.69      | 63.1 |
| Al       | EDS         | 49.57 | 0.69      | 36.9 |

**Table S2** Charge carrier trap depth ( $E$ , eV) and density ( $Q$ , nC) determined by TSDC curves of pure PEI and composite films

| Film    | Peak 1   |          | Peak 2   |          |
|---------|----------|----------|----------|----------|
|         | $E$ (eV) | $Q$ (nC) | $E$ (eV) | $Q$ (nC) |
| WAO/PEI | 2.07     | 64.08    | 1.29     | 44.20    |
| PEI     | 1.45     | 136.68   | 0        | 0        |



## References

- [S1] B. Zhang, X. m. Chen, Z. Pan, P. Liu, M. Mao, K. Song, Z. Mao, R. Sun, D. Wang, S. Zhang, *Adv. Funct. Mater.* 2022, **33**, 2210050.
- [S2] F. Wang, H. Wang, X. Shi, C. Diao, C. Li, W. Li, X. Liu, H. Zheng, H. Huang, X. Li, *Chem. Eng. J.* 2024, **485**, 149972.
- [S3] J Ding, Y Zhou, W Xu, F Yang, D Zhao, Y Zhang, Z Jian, Qing Wang, *Nano-Micro Lett.* 2023, **16**, 59-67.
- [S4] M. Yang, Y. Zhao, Z. Wang, H. Yan, Z. Liu, Q. Li, Z.-M. Dang, *Energy Environ.Sci.* 2024, **17**, 1592-1602.
- [S5] W. Ren, M. Yang, L. Zhou, Y. Fan, S. He, J. Pan, T. Tang, Y. Xiao, C. W. Nan, Y. Shen, *Adv. Mater.* 2022, **34**, 2207421.
- [S6] M. Yang, F. Yuan, W. Shi, W. Ren, M. Guo, C. Ouyang, L. Zhou, N. Sun, Y. Xiao, E. Xu, X. Zhang, Y. Wei, X. Deng, C. Nan, X. Wang, Y. Shen, *Adv. Funct. Mater.* 2023, **33**, 2214100.
- [S7] W. Ren, M. Yang, M. Guo, L. Zhou, J. Pan, Y. Xiao, E. Xu, C. Nan, Y. Shen, *Energy Storage Mater.* 2024, **65**, 103095.
- [S8] M. Liu, J. Song, H. Qin, S. Qin, Y. Zhang, W. Xia, C. Xiong, F. Liu, *Adv. Funct. Mater.* 2024, **34**, 2313258.
- [S9] M. Yang, S. Wang, J. Fu, Y. Zhu, J. Liang, S. Cheng, S. Hu, J. Hu, J. He, Q. Li, *Adv. Mater.* 2023, **35**, 2301936.
- [S10] J. Chen, Z. Pei, Y. Liu, K. Shi, Y. Zhu, Z. Zhang, P. Jiang, X. Huang, *Adv. Mater.* 2023, **35**, 2306562.
